# Supplementary material
Source: PubMed Central journal article supplement (PMC5584070)
Supplement: NIHMS813300-supplement-Supplements.pdf [file NIHMS813300-supplement-Supplements.pdf]

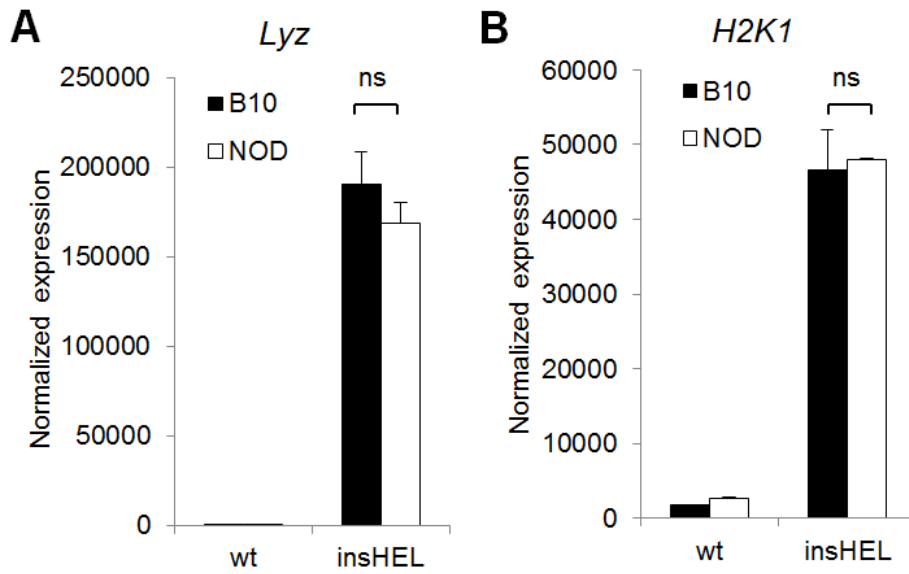

### Supplementary Figure 1

#### Equivalent islet insHEL expression on the B10 and NOD backgrounds.

RNA-seq was performed on the islets of wild-type (wt) B10<sup>k</sup>.*Rag*<sup>-/-</sup>, B10<sup>k</sup>.*Rag*<sup>-/-</sup>.insHEL, wt NOD<sup>k</sup>.*Rag*<sup>-/-</sup> and (pre-diabetic) NOD<sup>k</sup>.*Rag*<sup>-/-</sup>.insHEL mice ( $n = 3/\text{group}$ ). (a) Reads were aligned to a custom genome build combining chicken chromosome 1 with the mouse genome, with normalized counts displayed for chicken *Lyz*, the gene encoding HEL. (b) Expression of *H2k1*, of which the transmembrane region is included in the insHEL construct to encode a membrane anchor. Means  $\pm$  s.e.m.

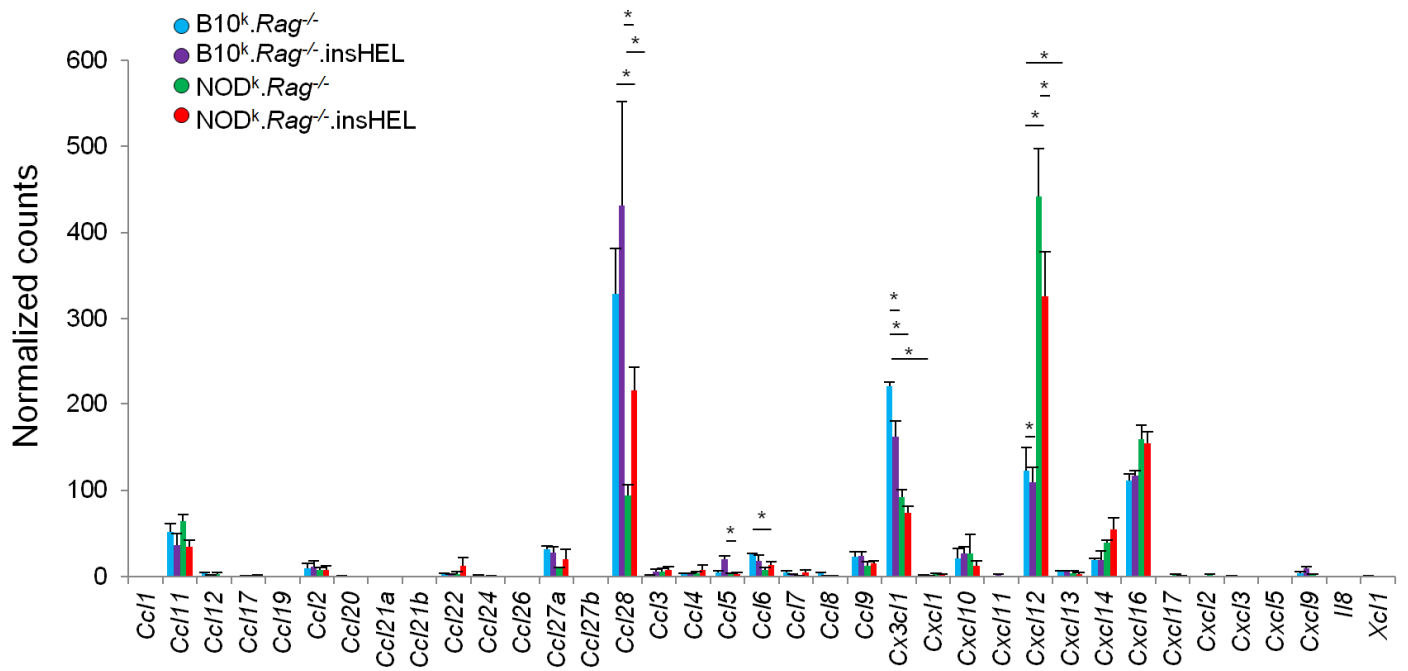

**Supplementary Figure 2**

**No effect of insHEL insertion on chemokine gene expression from the endogenous locus.**

RNA-seq was performed on the islets of B10<sup>k</sup>.Rag<sup>-/-</sup>, B10<sup>k</sup>.Rag<sup>-/-</sup>.insHEL, NOD<sup>k</sup>.Rag<sup>-/-</sup> and (pre-diabetic) NOD<sup>k</sup>.Rag<sup>-/-</sup>.insHEL mice (*n* = 3/group). Expression of chemokines is given for each strain. Means ± s.e.m.: \**P* < 0.05.

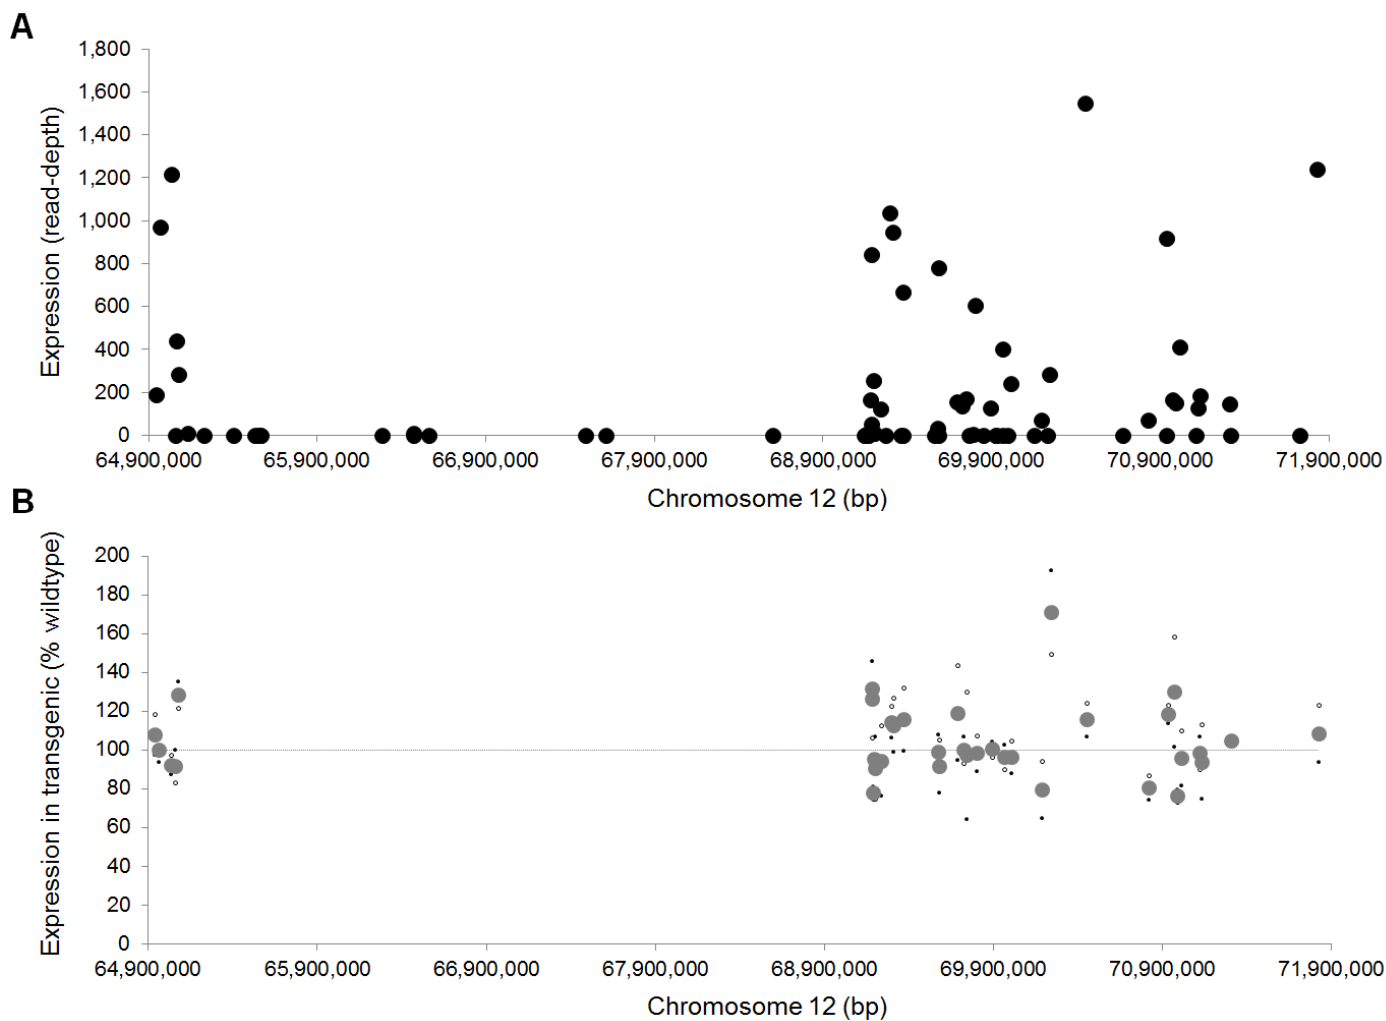

**Supplementary Figure 3**

**No effect of insHEL insertion on gene expression from the endogenous locus.**

The gene insertion site of insHEL was defined by the congenic region remaining in the backcross to the NOD background. The outer boundaries of the integration site were identified on chromosome 12 (64,900,000–71,900,000). RNA-seq was performed on the islets of  $B10^k.Rag^{-/-}$ ,  $B10^k.Rag^{-/-}.insHEL$ ,  $NOD^k.Rag^{-/-}$  and (pre-diabetic)  $NOD^k.Rag^{-/-}.insHEL$  mice ( $n = 3/group$ ). (a) Expression of genes within the integration boundaries in  $B10^k.Rag^{-/-}$  islets. (b) For all genes with reliable expression detection within the boundaries, the effect of insHEL expression was assessed as the expression in transgenic islets as a percentage of the expression in non-transgenic islets on the  $B10^k$  strain (black),  $NOD^k$  strain (white) or average of the two strains (gray). No genes in the interval showed a significant change in expression.

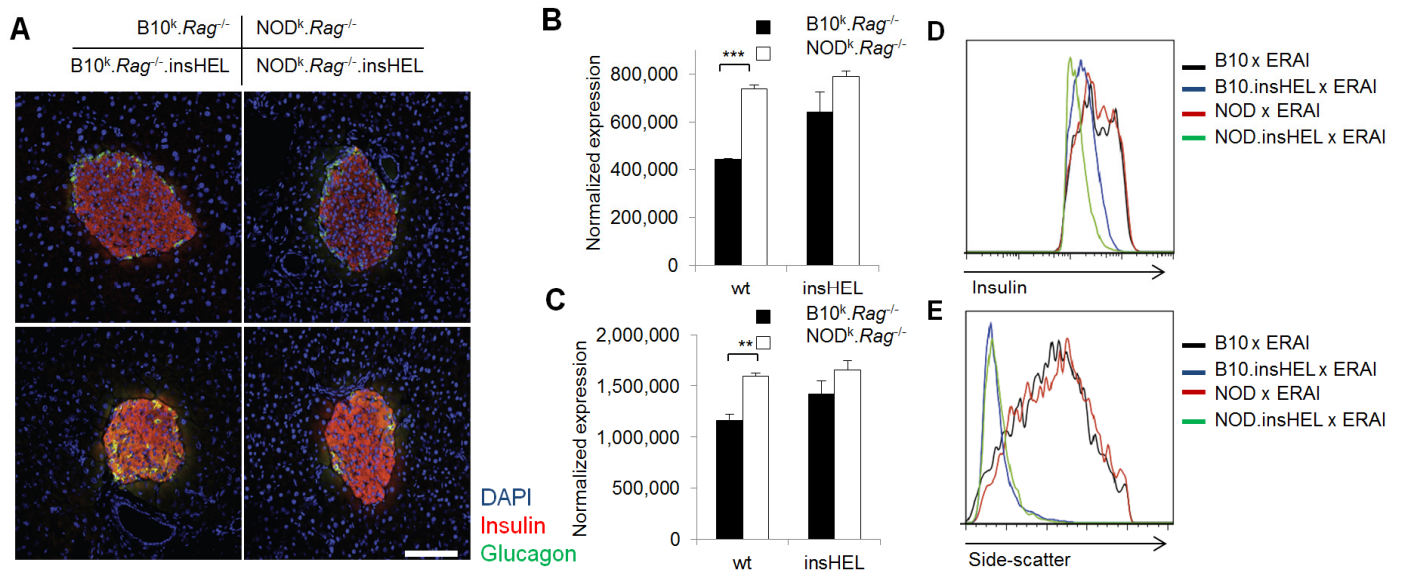

#### Supplementary Figure 4

##### Altered insulin expression in the islets of insHEL transgenic mice.

(a) Immunofluorescence analysis was performed on the islets of wild-type (wt) B10<sup>k</sup>.Rag<sup>-/-</sup>, B10<sup>k</sup>.Rag<sup>-/-</sup>.insHEL, wt NOD<sup>k</sup>.Rag<sup>-/-</sup> and (pre-diabetic) NOD<sup>k</sup>.Rag<sup>-/-</sup>.insHEL mice with a polyclonal antibody to insulin, antibody to glucagon and DAPI. Staining is representative of three experiments. Scale bar, 100 μm. (b,c) RNA-seq analysis was performed on the islets of B10<sup>k</sup>.Rag<sup>-/-</sup>, B10<sup>k</sup>.Rag<sup>-/-</sup>.insHEL, NOD<sup>k</sup>.Rag<sup>-/-</sup> and (pre-diabetic) NOD<sup>k</sup>.Rag<sup>-/-</sup>.insHEL mice ( $n = 3/\text{group}$ ). Expression is shown for *Ins1* (b) and *Ins2* (c). (d,e) ERAI mice were crossed to B10<sup>k</sup>.Rag<sup>-/-</sup>.insHEL and NOD<sup>k</sup>.Rag<sup>-/-</sup>.insHEL mice, and islets were analyzed by flow cytometry. Histograms are shown of insulin (d) and side scatter in insulin-expressing beta cells (e). Results are representative of three experiments. Means  $\pm$  s.e.m. \*\* $p < 0.001$ .

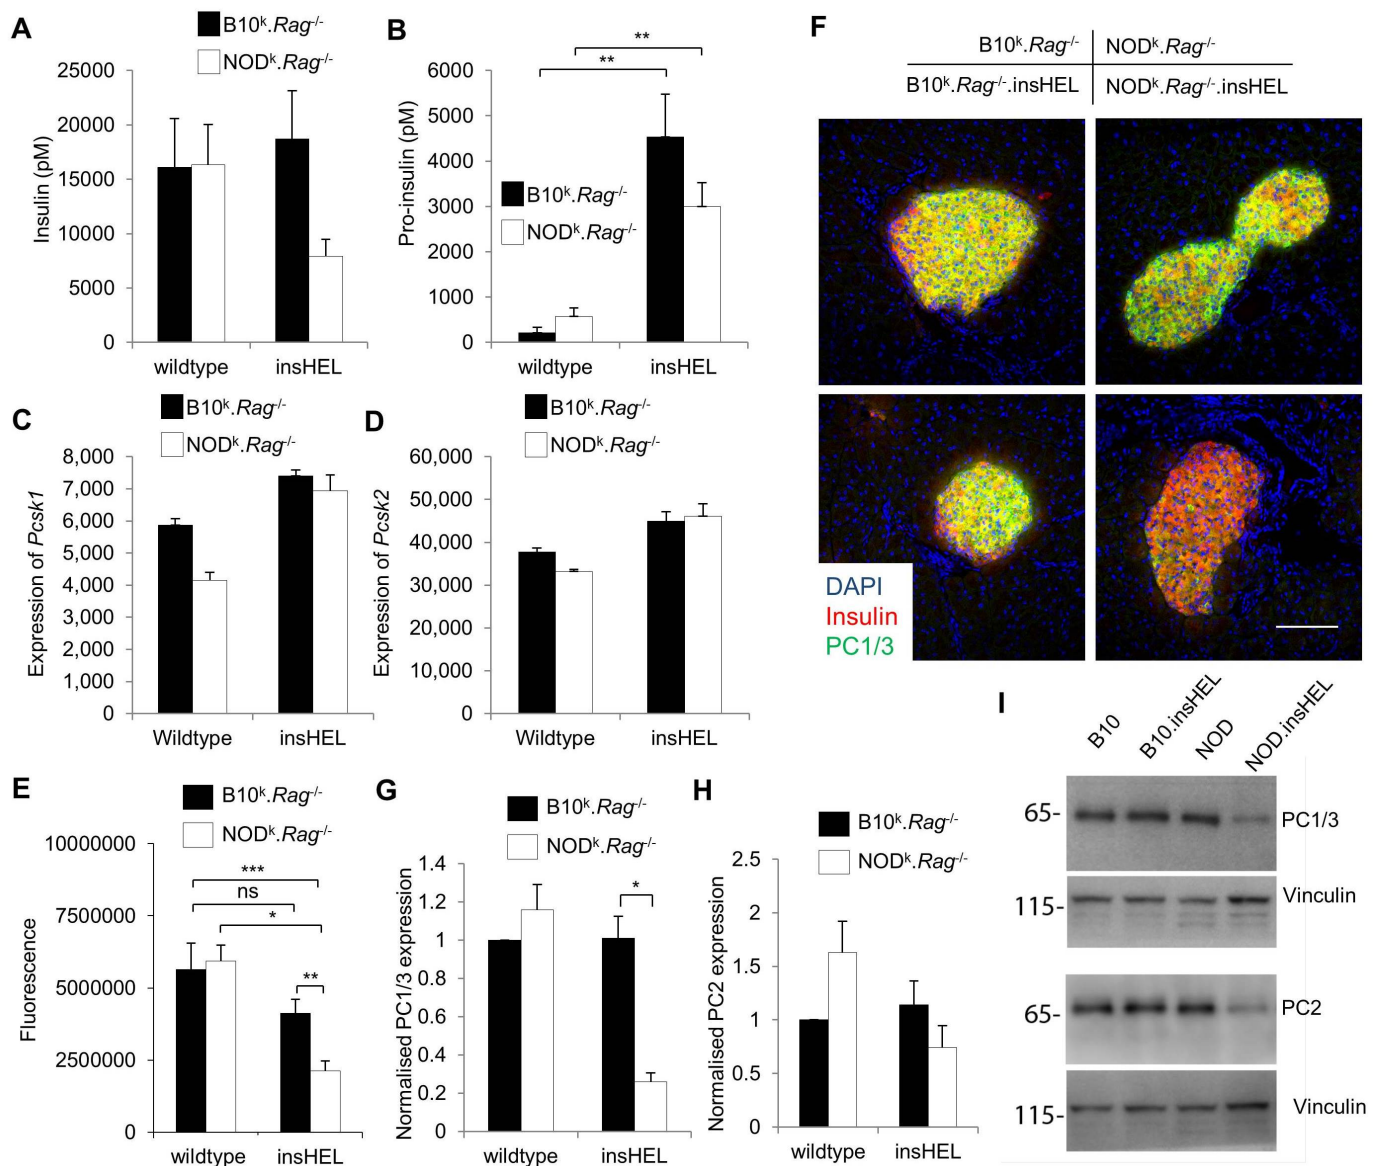

**Supplementary Figure 5**

**Transgene-induced beta cell stress results in disturbed insulin processing.**

(a,b) Islets from B10<sup>k</sup>.Rag<sup>0/0</sup>, B10<sup>k</sup>.Rag<sup>0/0</sup>.insHEL, NOD<sup>k</sup>.Rag<sup>0/0</sup> and NOD<sup>k</sup>.Rag<sup>0/0</sup>.insHEL mice were cultured *in vitro* in the presence of a high (25 mM) glucose concentration ( $n = 5/\text{group}$ ) and assessed for insulin (a) and proinsulin (b) secretion by ELISA. (c,d) RNA-seq analysis was performed on the islets of B10<sup>k</sup>.Rag<sup>0/0</sup>, B10<sup>k</sup>.Rag<sup>0/0</sup>.insHEL, NOD<sup>k</sup>.Rag<sup>0/0</sup> and (pre-diabetic) NOD<sup>k</sup>.Rag<sup>0/0</sup>.insHEL mice ( $n = 3/\text{group}$ ). Expression is shown for *Pcsk1* (prohormone convertase 1-3) (c) and *Pcsk2* (prohormone convertase 2) (d). (e,f) Pancreas immunofluorescence with a polyclonal antibody to insulin, antibody to PC1 and PC3, and DAPI, with mice of the B10<sup>k</sup>.Rag<sup>0/0</sup> and NOD<sup>k</sup>.Rag<sup>0/0</sup> backgrounds. Quantification is shown for islet raw fluorescence in the PC1-PC3 channel ( $n = 10, 16, 17, 16$ ) (e), with representative sections (f). Scale bar, 100  $\mu\text{m}$ . (g-i) Quantification of immunoblot analysis of islets from B10<sup>k</sup>, B10<sup>k</sup>.insHEL, NOD<sup>k</sup> and NOD<sup>k</sup>.insHEL mice for PC1-PC3 (g) and PC2 (h), with representative blots ( $n = 3/\text{group}$ ) (i). Means  $\pm$  s.e.m.: \* $P < 0.05$ , \*\* $P < 0.001$ , \*\*\* $P < 0.0001$ .

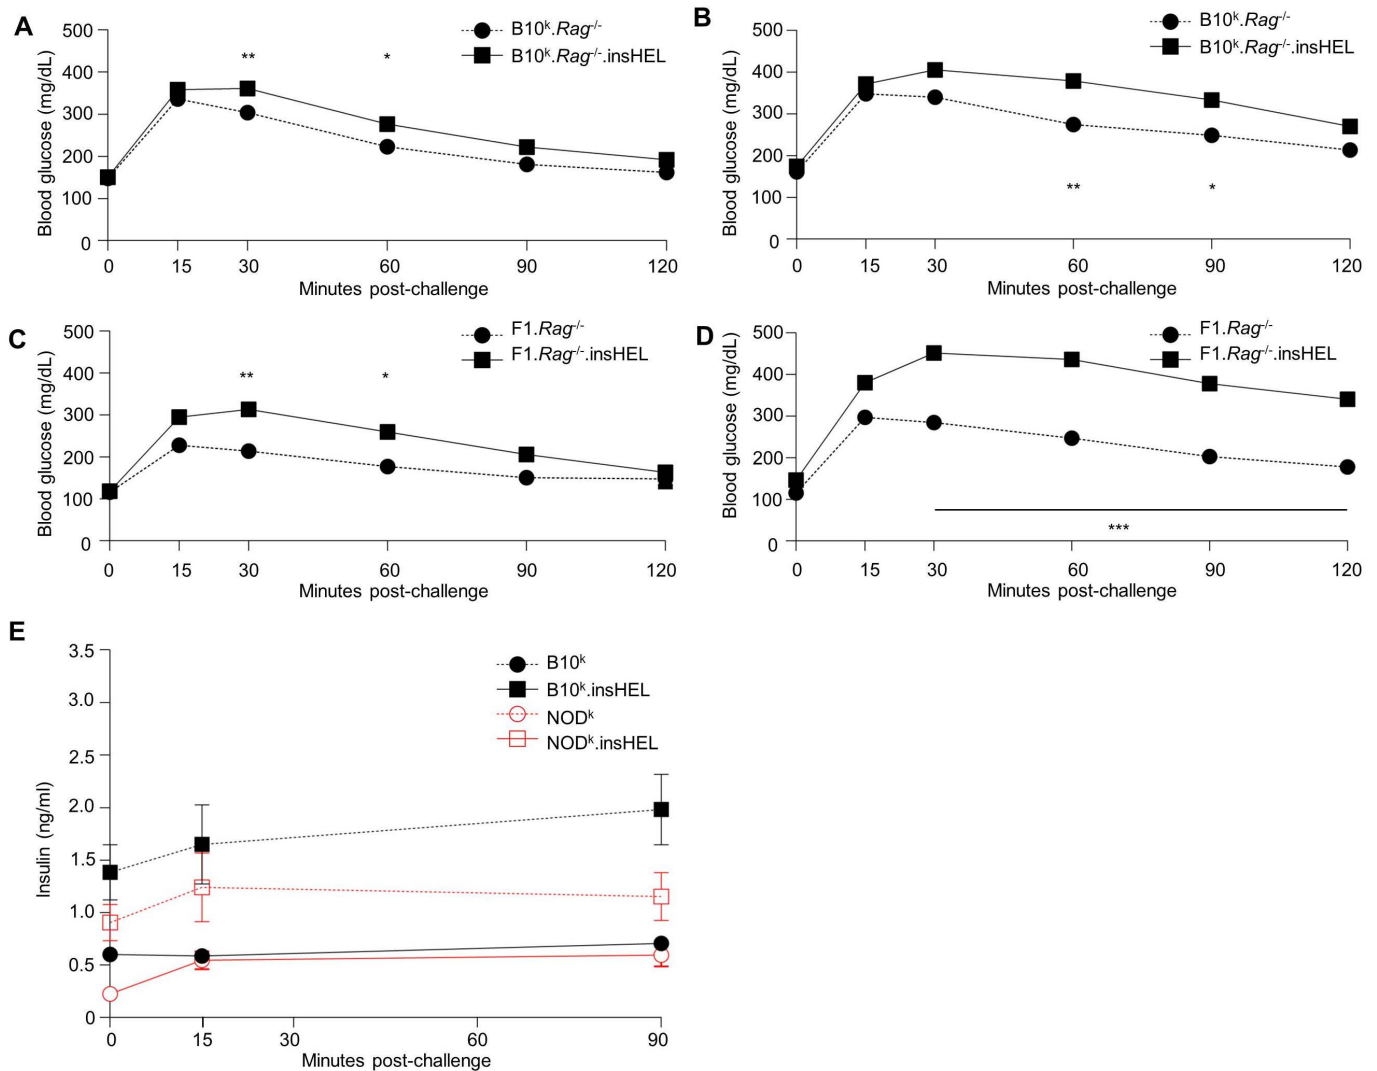

**Supplementary Figure 6**

**Glucose intolerance in insHEL transgenic mice.**

(a,b) Blood glucose levels following a glucose tolerance test in  $B10^k.Rag^{-/-}$  ( $n = 15$ ) and  $B10^k.Rag^{-/-}.insHEL$  ( $n = 17$ ) mice at 12 (a) and 24 (b) weeks of age. (c,d) Blood glucose levels following a glucose tolerance test in ( $B10^k \times NOD^k$ ) $F_1.Rag^{-/-}$  ( $n = 11$ ) and pre-diabetic ( $B10^k \times NOD^k$ ) $F_1.Rag^{-/-}.insHEL$  ( $n = 19$ ) mice at 12 (c) and 24 (d) weeks of age. (e) Blood insulin levels following a glucose tolerance test in  $B10^k$  ( $n = 5$ ),  $B10^k.insHEL$  ( $n = 4$ ),  $NOD^k$  ( $n = 15$ ) and  $NOD^k.insHEL$  ( $n = 9$ ) mice at 12 weeks of age. Means  $\pm$  s.e.m.: \* $P < 0.05$ , \*\* $P < 0.001$ , \*\*\* $P < 0.0001$ .

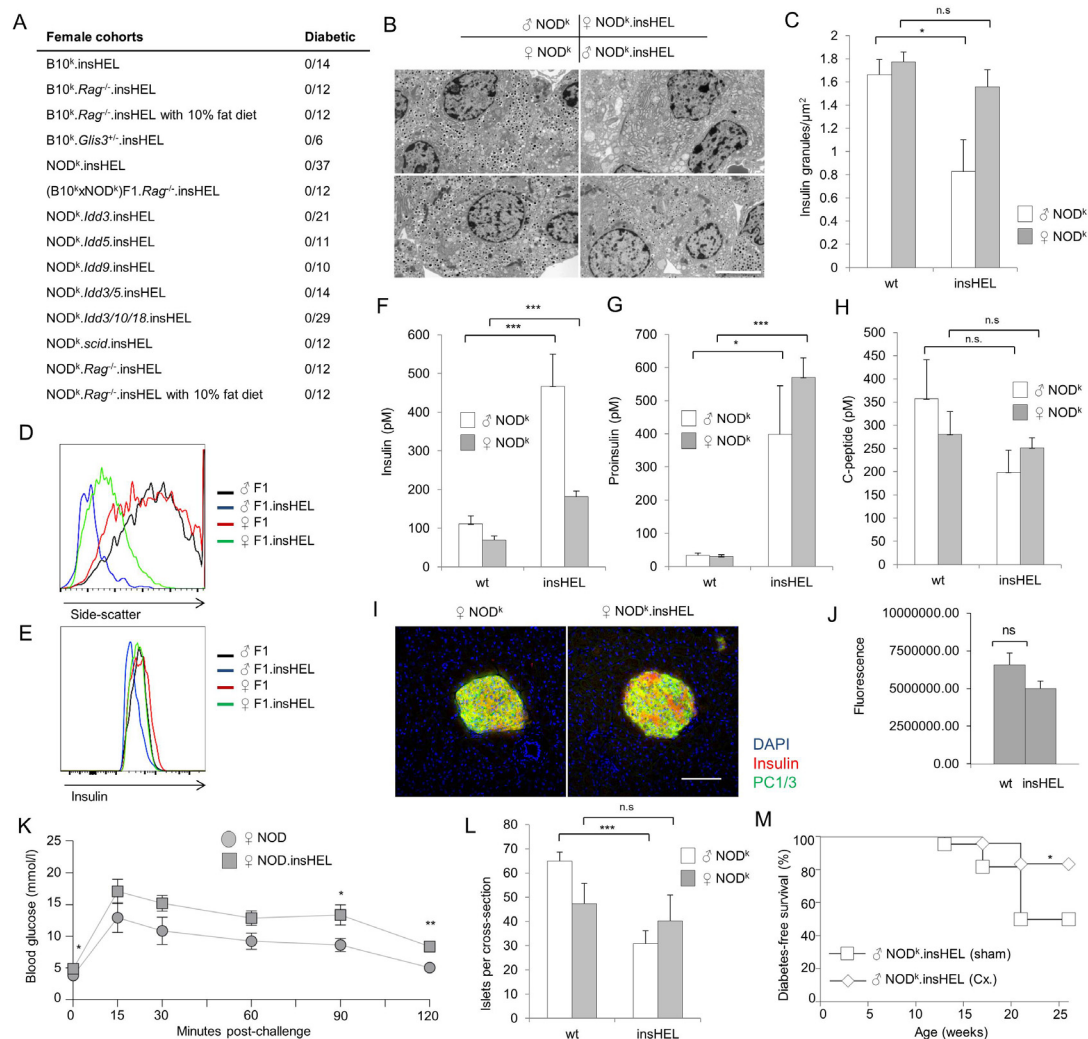

## Supplementary Figure 7

### Sex hormones control susceptibility to islet stress and diabetes.

(a) Table of the incidence of diabetes at 26 weeks of age in female insHEL transgenic mice. (b) Representative electron microscopy images of beta cells from male and female NOD<sup>k</sup> and NOD<sup>k</sup>.insHEL mice at 12 weeks of age. Scale bar, 5  $\mu$ m. (c) Images were used to assess the number of insulin granules per cellular cross-section ( $n = 3$ /group). (d,e) ERAI mice were crossed to NOD<sup>k</sup>.*Rag*<sup>-/-</sup>.insHEL mice, and islets were analyzed by flow cytometry. Histograms show side scatter in insulin-expressing beta cells (d) and insulin (e). Results are representative of three experiments. (f–h) Fasting serum samples from male and female NOD<sup>k</sup> and NOD<sup>k</sup>.insHEL mice at 24 weeks of age were assessed by ELISA for insulin ( $n = 11, 11, 12, 7$ ) (f), proinsulin ( $n = 11, 11, 12, 8$ ) (g) and C-peptide ( $n = 11, 11, 9, 8$ ) (h). (i,j) Pancreas immunofluorescence with a polyclonal antibody to insulin, antibody to PC1 and PC3, and DAPI, with female NOD<sup>k</sup>.*Rag*<sup>-/-</sup> mice. Representative sections (scale bar, 100  $\mu$ m) are shown (i), with quantification of islet raw fluorescence in the PC1-PC3 channel ( $n = 15, 25$ ) (j). (k) Blood glucose levels in 12-week-old female NOD<sup>k</sup> ( $n = 10$ ) and NOD<sup>k</sup>.insHEL ( $n = 9$ ) mice following glucose tolerance test. (l) Average number of islets per pancreatic section in female NOD<sup>k</sup> and NOD<sup>k</sup>.insHEL mice at 28 weeks of age ( $n = 3$  mice/group). (m) Incidence of diabetes in NOD<sup>k</sup> insHEL transgenic male mice, with ( $n = 24$ ) and without ( $n = 24$ ) castration. Means  $\pm$  s.e.m.: \* $P < 0.05$ , \*\* $P < 0.001$ , \*\*\* $P < 0.0001$ .

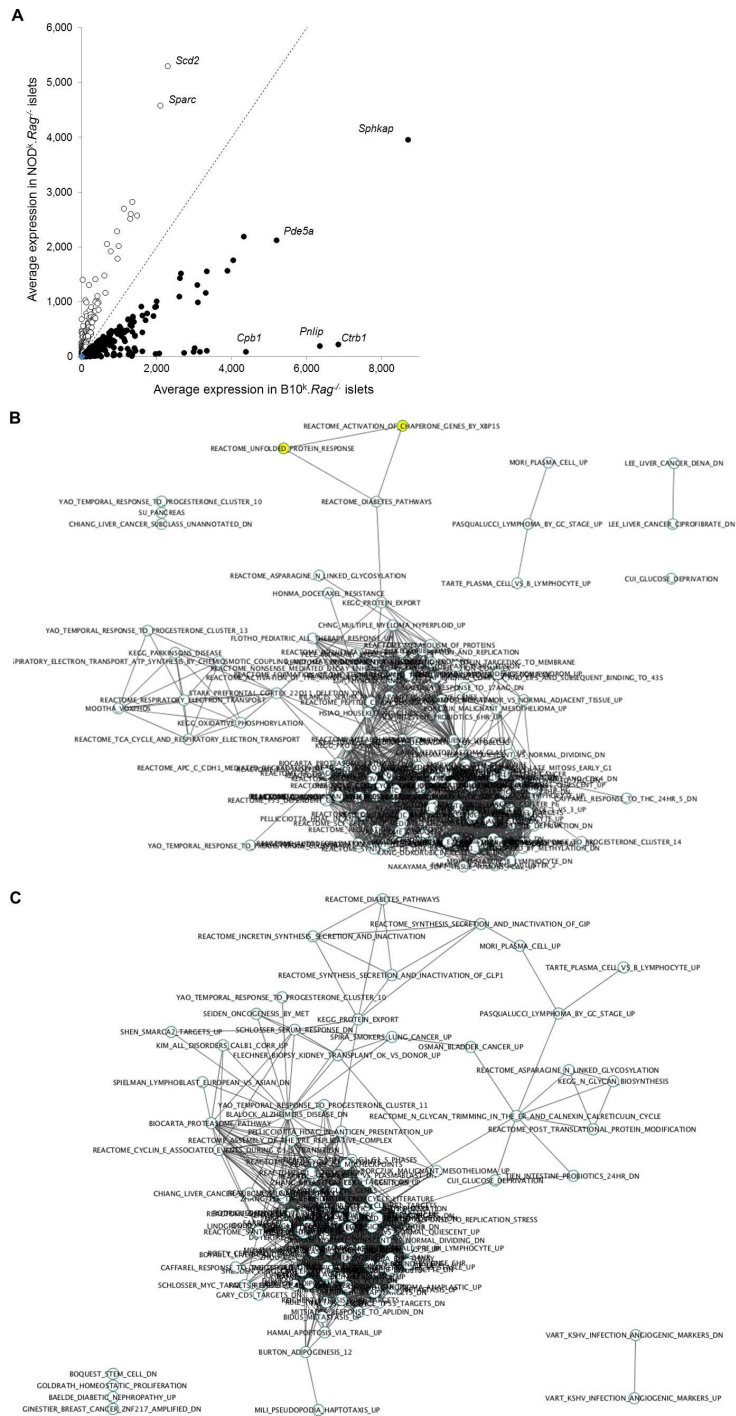

**Supplementary Figure 8**

**Expression of insHEL activates similar gene sets in B10 and NOD islets.**

(a) Genes with significant expression changes between B10<sup>k</sup>.Rag<sup>-/-</sup> and NOD<sup>k</sup>.Rag<sup>-/-</sup> islets were plotted for average expression. Outliers are annotated, *Scg2* is not shown. (b,c) Cytoscape enrichment map for significant gene sets (FDR < 0.001) between B10<sup>k</sup>.Rag<sup>-/-</sup> islets and B10<sup>k</sup>.Rag<sup>-/-</sup>.insHEL islets (b) or NOD<sup>k</sup>.Rag<sup>-/-</sup> islets and NOD<sup>k</sup>.Rag<sup>-/-</sup>.insHEL islets (c). UPR and Xbp1 response gene sets are shown in yellow.



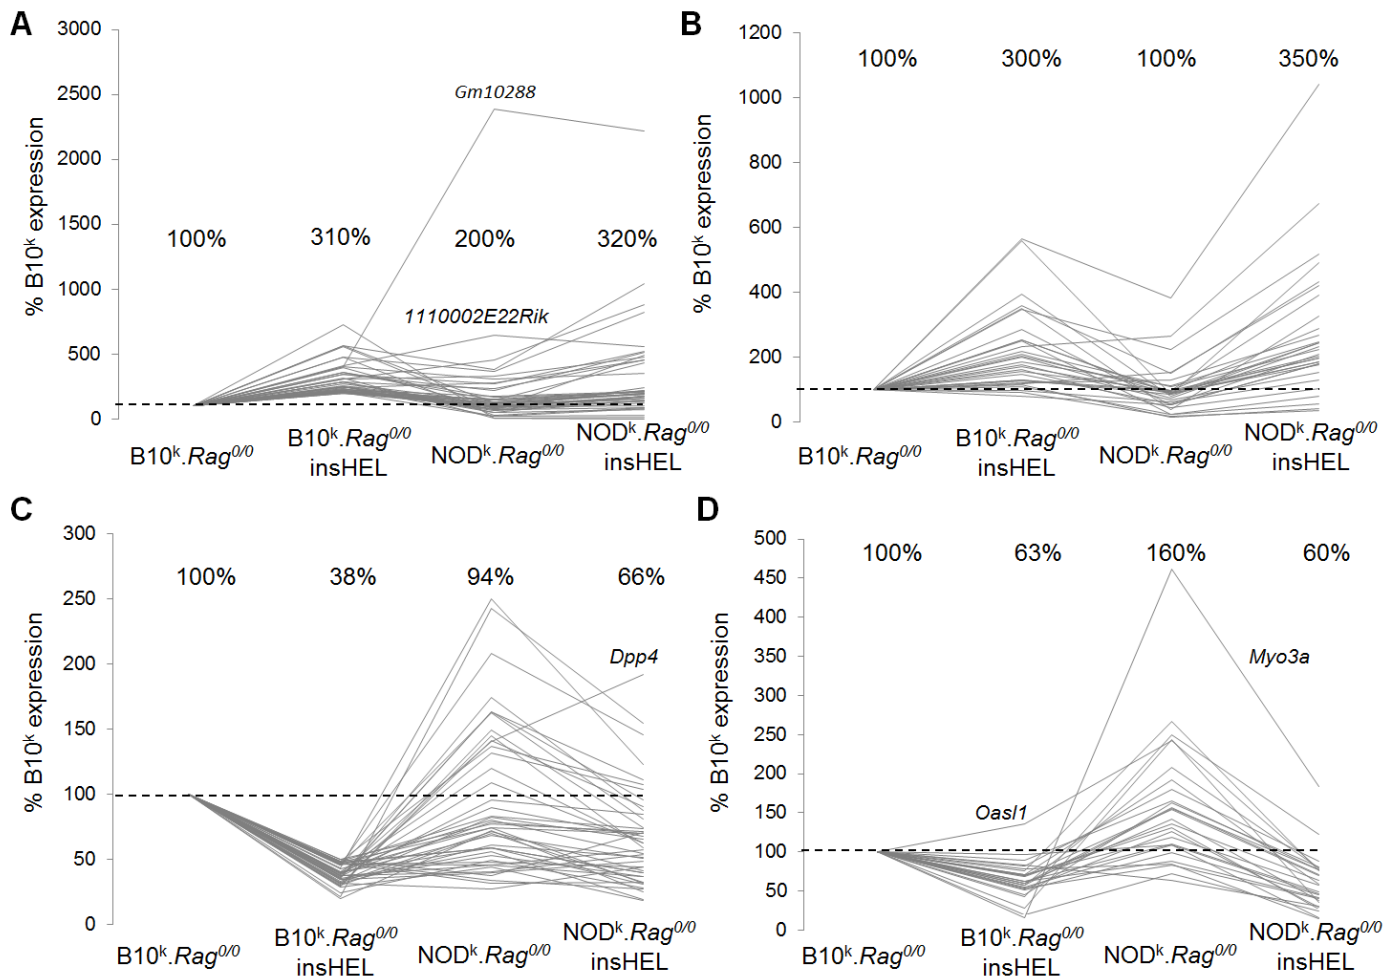

**Supplementary Figure 9**

**Expression of insHEL induces similar transcriptional changes in qualitatively different B10 and NOD islets.**

(a,b) Expression of genes significantly upregulated between B10<sup>k</sup>.*Rag*<sup>-/-</sup> islets and B10<sup>k</sup>.*Rag*<sup>-/-</sup>.insHEL islets (a) or between NOD<sup>k</sup>.*Rag*<sup>-/-</sup> islets and NOD<sup>k</sup>.*Rag*<sup>-/-</sup>.insHEL islets (b), with the average expression shown across all samples. Data represented are normalized to the expression in B10<sup>k</sup>.*Rag*<sup>-/-</sup> islets, with the average percentage and outliers annotated. *H2k1* is not shown. (c,d) Expression of genes significantly downregulated between B10<sup>k</sup>.*Rag*<sup>-/-</sup> islets and B10<sup>k</sup>.*Rag*<sup>-/-</sup>.insHEL islets (c) or between NOD<sup>k</sup>.*Rag*<sup>-/-</sup> islets and NOD<sup>k</sup>.*Rag*<sup>-/-</sup>.insHEL islets (d), with the average expression shown across all samples. Data represented are normalized to the expression in B10<sup>k</sup>.*Rag*<sup>-/-</sup> islets, with the average percentage and outliers annotated.

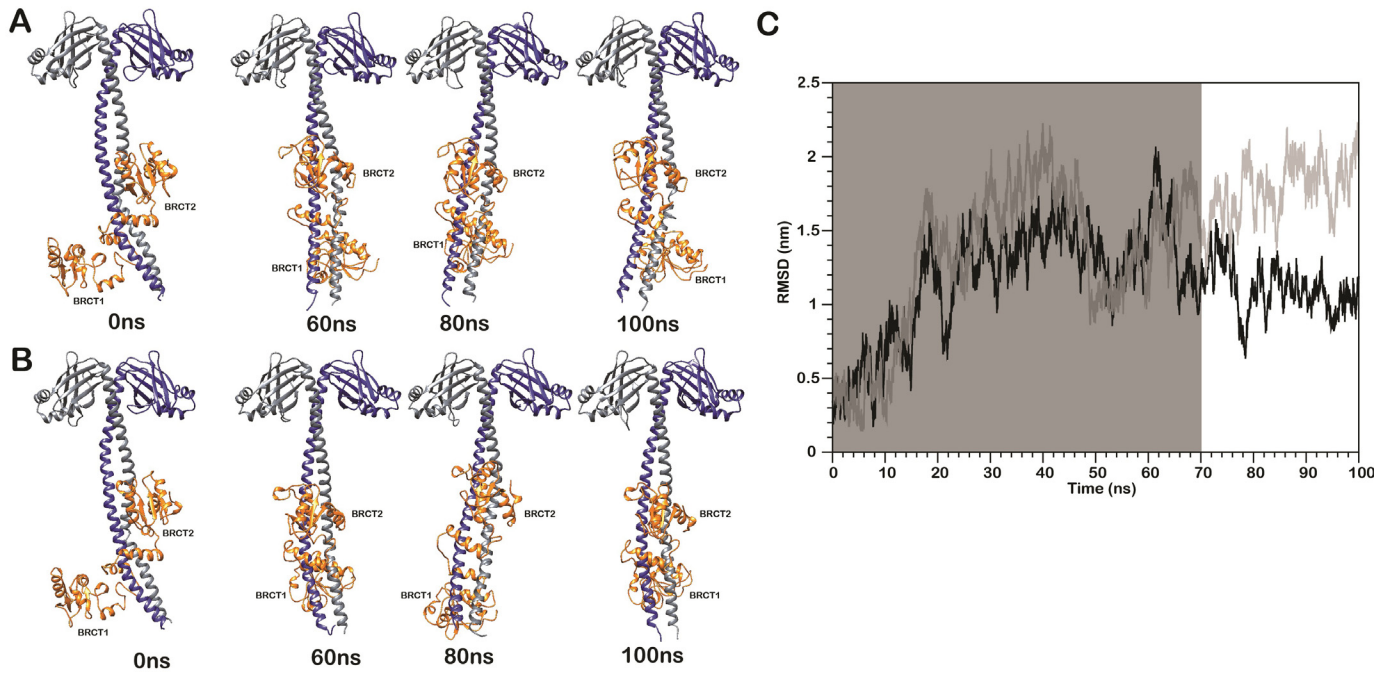

**Supplementary Figure 10**

**Molecular modeling of the effect of p.Ala27Thr and p.Glu125Asp mutations on Xrcc4 stability.**

Simulation of the movements of the DNA ligase IV complex during 100-ns simulation. **(a,b)** Representative snapshots of the B10 allele **(a)** and NOD allele **(b)** for the DNA ligase IV complex extracted from the two trajectories at 0 ns, 60 ns, 80 ns and 100 ns. **(c)** Root-mean-square deviation of the BRCT2 domain of ligase 4 calculated with respect to the fixed position of BRCT1. Movements after the initial 70 ns of equilibrium were considered reliable. The black and gray lines represent ligase IV from the B10 and NOD alleles, respectively. Results are representative of four simulations.

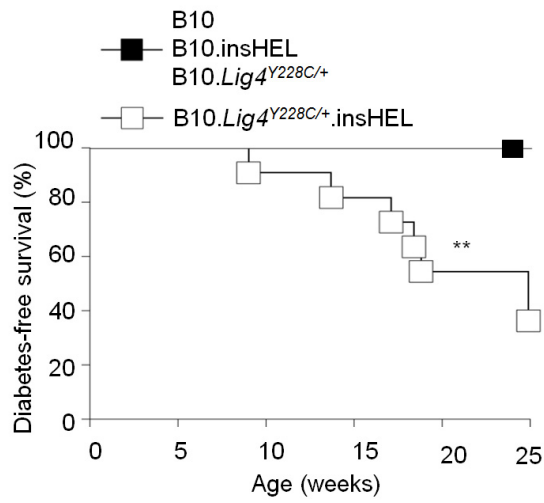

**Supplementary Figure 11**

**DNA ligase 4 hypomorph enhances susceptibility to diabetes.**

B10<sup>k</sup>.insHEL mice were intercrossed with the ligase 4 hypomorph Tyr288Cys, and diabetes incidence was analyzed in B10 ( $n = 6$ ), B10.Lig4<sup>Y228C/+</sup> ( $n = 5$ ), B10.insHEL ( $n = 7$ ) and B10.Lig4<sup>Y228C/+</sup>.insHEL ( $n = 11$ ) littermates. \*\* $P < 0.01$ .

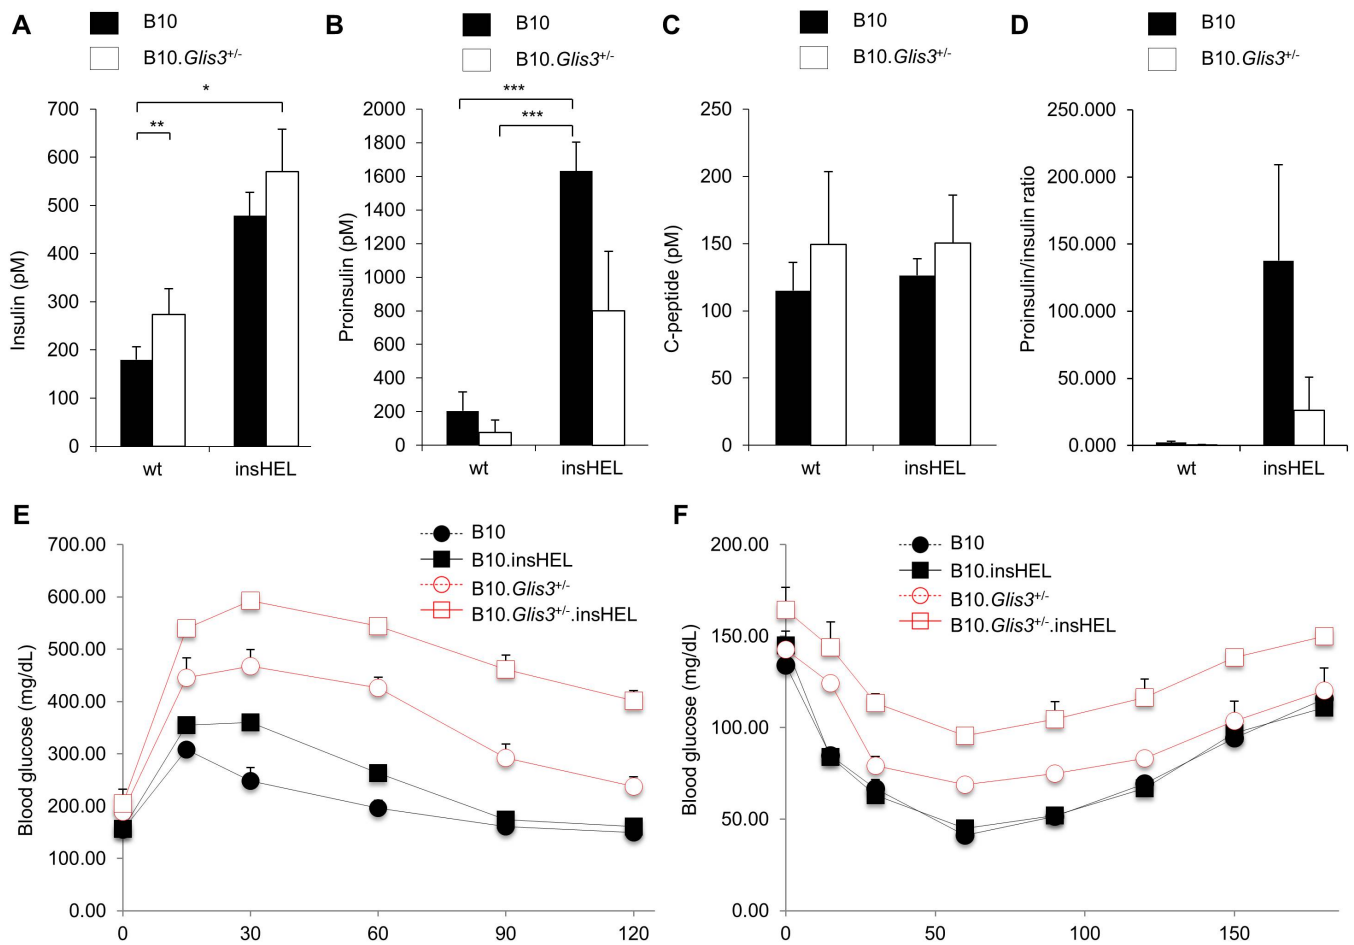

### Supplementary Figure 12

#### Transgene-induced beta cell stress results in disturbed insulin processing and glucose intolerance on the *Glis3* heterozygous background.

(a–d) Fasting serum samples from wild-type (wt) B10 ( $n = 30$ ), wt B10.Glis3<sup>+/-</sup> ( $n = 6$ ), B10.insHEL ( $n = 51$ ) and B10.Glis3<sup>+/-</sup>.insHEL ( $n = 7$ ) mice at 10 weeks of age were assessed by ELISA for insulin (a), proinsulin (b), C-peptide (c) and proinsulin/insulin ratio (d). (e,f) Blood glucose levels in 12-week-old B10 ( $n = 6$ ), B10.insHEL ( $n = 1$ ), B10.Glis3<sup>+/-</sup> ( $n = 3$ ) and (non-diabetic) B10.Glis3<sup>+/-</sup>.insHEL ( $n = 4$ ) mice following glucose tolerance test ( $n = 28, 47, 9, 21$ ) (e) or insulin tolerance test ( $n = 8, 17, 3, 13$ ) (f). Means  $\pm$  s.e.m.: \* $P < 0.05$ , \*\* $P < 0.001$ , \*\*\* $P < 0.0001$ .

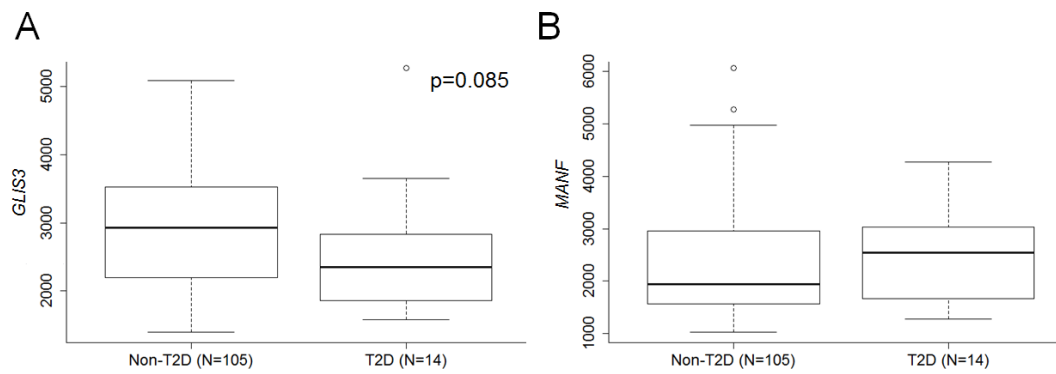

### Supplementary Figure 13

#### Expression of *GLIS3* and *MANF* in the islets of patients with T2D.

mRNA expression in human pancreatic islets from healthy individuals ( $n = 105$ ) and individuals diagnosed with T2D ( $n = 14$ ) was assessed through RNA-seq analysis. (a,b) Expression of *GLIS3* (a) and *MANF* (b) in islets from healthy individuals as compared to islets from individuals with T2D. The median and interquartile range (box) are shown, with error bars indicating 1.5xIQR (interquartile range). Individual values are shown if beyond 1.5xIQR.

**Supplementary Table 1. Identification of candidates for *Tid1*, *Tid2* and *Tid3***

| Gene name                           | Position | Selection method                       | mRNA expression                                      |
|-------------------------------------|----------|----------------------------------------|------------------------------------------------------|
| <i>Tid1</i> (Chr 13, 19.7cM–27.0cM) |          |                                        |                                                      |
| <i>Gm6245</i>                       | 40778040 | Transcriptomics                        | ↓ on NOD background vs B10                           |
| <i>rs13481783</i>                   | 42287337 | Peak linkage                           |                                                      |
| <i>Gmpr</i>                         | 45507444 | Transcriptomics                        | ↓ on NOD background vs B10                           |
| <i>Rbm24</i>                        | 46418300 | Transcriptomics                        | ↓ on NOD background vs B10                           |
| <i>Cap2</i>                         | 46501848 | Transcriptomics                        | ↓ on NOD background vs B10                           |
| <i>Wnk2</i>                         | 49036303 | Transcriptomics                        | ↓ by insHEL on NOD background only                   |
| <i>Ogn</i>                          | 49608071 | Transcriptomics                        | Failure to be suppressed by insHEL on NOD background |
| <i>Hist1h2a1</i>                    | 51202688 | Transcriptomics                        | ↑ on NOD background vs B10                           |
| <i>Diras2</i>                       | 52504375 | Transcriptomics                        | ↓ on NOD background vs B10                           |
| <i>Tid2</i> (Chr 13 38.5cM–47.8cM)  |          |                                        |                                                      |
| <i>Gpr98</i>                        | 81095068 | Transcriptomics                        | ↑ in baseline NOD mice only                          |
| <i>gnf13.088.732</i>                | 84796434 | Peak linkage                           |                                                      |
| <i>Edil3</i>                        | 88821472 | Transcriptomics                        | ↑ on NOD background vs B10                           |
| <i>Vcan</i>                         | 89655312 | Transcriptomics                        | ↓ in baseline NOD mice only                          |
| <i>Xrcc4</i>                        | 90001025 | Missense SNP<br>(p.Ala27Thr.Glu125Asp) | No expression difference                             |
| <i>Rasgrf2</i>                      | 91880400 | Transcriptomics                        | ↓ on NOD background vs B10                           |
| <i>Thbs4</i>                        | 92751590 | Transcriptomics                        | ↑ by insHEL on NOD background only                   |
| <i>Tid3</i> (Chr 19, 21.8cM–40.6cM) |          |                                        |                                                      |
| <i>Gm9493</i>                       | 23619742 | Transcriptomics                        | ↓ on NOD background vs B10                           |
| <i>Ptar1</i>                        | 23687400 | Transcriptomics                        | ↓ on NOD background vs B10                           |
| <i>Pgm5</i>                         | 24683016 | Transcriptomics                        | ↑ in baseline NOD mice only                          |
| <i>Glis3</i>                        | 28258851 | Homology (T1D, T2D, other)             | ↓ on NOD background vs B10                           |
| <i>Ak3</i>                          | 29020833 | Proteomics<br>(↑ in NOD.insHEL)        | No expression difference                             |
| <i>rs6237466</i>                    | 31672951 | Peak linkage                           |                                                      |
| <i>Alcf</i>                         | 31868761 | Transcriptomics                        | ↓ on NOD background vs B10                           |
| <i>Asah2</i>                        | 31984654 | Transcriptomics                        | ↓ on NOD background vs B10                           |
| <i>1500017E2</i>                    | 36614052 | Transcriptomics                        | ↓ on NOD background vs B10                           |
| <i>Cep55</i>                        | 38055025 | Transcriptomics                        | ↑ by insHEL on NOD background only                   |
| <i>Slc35g1</i>                      | 38395980 | Transcriptomics                        | ↓ on NOD background vs B10                           |
| <i>Hells</i>                        | 38930915 | Transcriptomics                        | ↑ by insHEL on NOD background only                   |

**Supplementary Table 2. Genetic association with type 2 diabetes and glycemic traits at *GLIS3*, *MANF*, *XRCC4* and *LIG4* in humans.**

|                                                           | Lead variant | Position | Nearest gene    | Variant effect <sup>#</sup> | p                     |
|-----------------------------------------------------------|--------------|----------|-----------------|-----------------------------|-----------------------|
| <b><i>GLIS3</i> 100kb region (chr9:3724077-4399966)</b>   |              |          |                 |                             |                       |
| Type 2 diabetes                                           | rs4237150    | 4290085  | <i>GLIS3</i>    | 1.07                        | 3.4x10 <sup>-8</sup>  |
| HbA1c                                                     | rs7018983    | 4303682  | <i>GLIS3</i>    | 0.024                       | 0.0006                |
| Fasting glucose                                           | rs10814916   | 4293150  | <i>GLIS3</i>    | 0.0151                      | 4.58x10 <sup>-5</sup> |
| Two-hour glucose                                          | rs657076     | 3983003  | <i>GLIS3</i>    | -0.0715                     | 0.0014                |
| HOMA-B                                                    | rs7034200    | 4289050  | <i>GLIS3</i>    | -0.0156                     | 1.67x10 <sup>-6</sup> |
| Fasting insulin                                           | rs148199056  | 4117942  | <i>GLIS3</i>    | -0.311                      | 0.0008                |
| Two-hour insulin                                          | rs2380936    | 4106251  | <i>GLIS3</i>    | 0.0623                      | 0.0005                |
| HOMA-IR                                                   | rs7870234    | 3810281  | <i>GLIS3</i>    | -0.0138                     | 0.0028                |
| Proinsulin levels                                         | rs7037914    | 3890019  | <i>GLIS3</i>    | 0.032                       | 0.0003                |
| <b><i>MANF</i> 100kb region (chr3:51322428-51526878)</b>  |              |          |                 |                             |                       |
| Type 2 diabetes                                           | rs12631677   | 51496114 | <i>VPRBP</i>    | 0.241                       | 0.0037                |
| Two-hour glucose                                          | rs7620081    | 51500591 | <i>VPRBP</i>    | 0.104                       | 0.0154                |
| Fasting insulin                                           | rs17051762   | 51389976 | <i>DOCK3</i>    | -0.013                      | 0.0353                |
| Two-hour insulin                                          | rs7620081    | 51500591 | <i>VPRBP</i>    | .08                         | 0.0009                |
| HOMA-IR                                                   | rs9817872    | 51355875 | <i>DOCK3</i>    | -0.025                      | 0.0219                |
| <b><i>XRCC4</i> 100kb region (chr5:82273267-82749656)</b> |              |          |                 |                             |                       |
| Type 2 diabetes                                           | rs7727819    | 82274802 | <i>TMEM167A</i> | 1.05                        | 0.0039                |
| HbA1c                                                     | rs56334522   | 82491684 | <i>XRCC4</i>    | -0.613                      | 0.0.0018              |
| Fasting glucose                                           | rs17205642   | 82372827 | <i>TMEM167A</i> | -0.059                      | 0.0193                |
| Two-hour glucose                                          | rs256785     | 82308722 | <i>TMEM167A</i> | 0.063                       | 0.0091                |
| HOMA-B                                                    | rs40532      | 82295727 | <i>TMEM167A</i> | -0.054                      | 0.0026                |

|                   |             |          |                 |        |        |
|-------------------|-------------|----------|-----------------|--------|--------|
| Fasting insulin   | rs141304949 | 82649057 | <i>XRCC4</i>    | 0.905  | 0.0419 |
| Two-hour insulin  | rs871760    | 82748823 | <i>VCAN</i>     | 0.07   | 0.0396 |
| HOMA-IR           | rs40532     | 82295727 | <i>TMEM167A</i> | -0.047 | 0.014  |
| Proinsulin levels | rs7706470   | 82624287 | <i>XRCC4</i>    | -0.081 | 0.0064 |

***LIG4* 100kb region (chr13:108759737-108970766)**

|                   |            |           |                 |        |        |
|-------------------|------------|-----------|-----------------|--------|--------|
| Type 2 diabetes   | rs6492102  | 108779395 | <i>LIG4</i>     | 0.952  | 0.0082 |
| HbA1c             | rs2232637  | 108863437 | <i>LIG4</i>     | 0.888  | 0.0122 |
| Fasting glucose   | rs9587525  | 108855245 | <i>LIG4</i>     | 0.01   | 0.0091 |
| Two-hour glucose  | rs4145212  | 108960188 | <i>TNFSF13B</i> | -0.062 | 0.0051 |
| HOMA-B            | rs16972015 | 108778988 | <i>LIG4</i>     | -0.017 | 0.0453 |
| Two-hour insulin  | rs2766094  | 108951999 | <i>TNFSF13B</i> | 0.046  | 0.0297 |
| Proinsulin levels | rs10492664 | 108816225 | <i>LIG4</i>     | 0.054  | 0.0023 |

#Variant effect column shows odds ratios for type 2 diabetes and betas for glycemic traits.
